# Supplementary material for: Enhancing Eating Disorder Content in the Tertiary Curricula of Health Disciplines in Australia
Source: Research Square preprint supplement (doi:10.21203/rs.3.rs-6528338/v1), 2025-05-15
Supplement: Supplementary file 1 [file 0f56408d49bd5a600629bf5b.docx]

**Tertiary Evaluation Survey – Language Key**

Thank you for participating in NEDC's tertiary evaluation survey. In the following sections, we will be asking you questions about your professional role and knowledge about the tertiary curricula. Please see the below language key which will be available before every question block for your reference. This key provides definitions for some of the terminology used throughout the questionnaire. 🗝️

LANGUAGE KEY

**Program or specialisation** - The complete education/training program for a discipline area offered within your institution (e.g., Program of nursing, program of occupational therapy, program of general practice medicine). Includes all course/training areas/levels available to individuals who are interested in completing an undergraduate and/or post graduate qualification in the discipline area.

**Degree/course/training** - The degree/course/training that offers units of study that help individuals to complete the requirements toward a qualification in the discipline area (e.g., Bachelor of Health Sciences (Nutrition), Master of Nutrition and Dietetics, Master of Social Work, Doctor of Clinical Psychology, Master of Medicine (Rural Generalism)). Units of study/subjects The specific subjects taught within a degree/course/training that contribute towards meeting the requirements for a qualification in the discipline area.

**Eating disorder content** - Content that teaches information and builds knowledge about eating disorders, disordered eating and/or body image concerns.

**Eating disorder safe care** - Content that teaches information and knowledge about: (1) Providing care for people experiencing eating disorders, disordered eating or body image concerns in a way which does not exacerbate these existing concerns; and/or (2) Providing routine healthcare in any setting in a way which does not contribute to eating disorder risk (e.g. by avoiding health care practices that overfocus on weight, contribute to body-based stigma or uphold unrealistic ideals about bodies, food and behaviour) and promotes protective factors (e.g. promoting weight-inclusive, body esteem building practices).
