# Supplementary material for: Enhancing Eating Disorder Content in the Tertiary Curricula of Health Disciplines in Australia
Source: Research Square preprint supplement (doi:10.21203/rs.3.rs-6528338/v1), 2025-05-15
Supplement: Supplementary file 2 [file 3cc5b7102d5822aac72703f5.docx]

**NEDC Tertiary Evaluation Survey Protocol**

*Thank you for participating in NEDC's tertiary evaluation survey. In the following sections, we will be asking you questions about your professional role and knowledge about the tertiary curricula.*

| **6.** | **Please select the Institution you work within or provide services for from the following list.**  *Reminder - data related to your institution will not be identified in any dissemination of survey results. If your institution does not appear in the drop-down, please list this in the text box. If you work across multiple institutions, please select a primary institution and respond to the survey based on the work you undertake with this institution. You can submit a new survey for additional institutions if you wish.* |
| --- | --- |
|  | Education Institute  Acknowledge Education  ACT Psychiatry Training Program  Australian Catholic University  Australian College of Applied Professions  Australian National University  Bond University  Carinmillar Institute  Central Queensland University  Charles Darwin University  Charles Sturt University  Chisholm Institute  Curtin University  Deakin University  Edith Cowen University  Excelsia College  Federation University Australia  Flinders University  Griffith University  Health Education and Training Institute (HETI)  Hunter New England Training in Psychiatry (HNET)  Institute of Health and Management (IHM)  ISN Psychology Pty Ltd  James Cook University  La Trobe University  Macquarie University  Monash University  Murdoch University  Postgraduate Training in Psychiatry QLD  Postgraduate Training in Psychiatry WA  Queensland University of Technology  RMIT University  South Australian Psychiatric Branch Training Committee  Southern Cross University  Swinburne Online  Swinburne University of Technology  TAFE NSW  TAFE Queensland  TAS Psychiatric Training Program  TasTAFE  Torrens University  University of Adelaide  University of Canberra  University of Melbourne  University of New England  University of New South Wales  University of Newcastle  University of Notre Dame  University of Queensland  University of South Australia  University of Southern Queensland  University of Sunshine Coast  University of Sydney  University of Tasmania  University of Technology, Sydney  University of Western Australia  University of Wollongong  Victoria University  Western Sydney University  Other (please specify)  *[Additional Text]* |
| **7.** | **Please select which program/specialisation you teach in, or oversee.**  *If you work across more than one, please select your primary program/specialisation.* |
|  | Dietetics  Nursing  General Practice Medicine  Medicine  Midwifery  Nutrition  Occupational Therapy  Psychiatry  Psychology  Social Work  Other (please specify)  *[Additional Text]* |
| **8.** | **What is your role in the program/specialisation within your institution?**  *(select all that apply)* |
|  | Head of School  Course Convener/Coordinator  Clinical educator  Lecturer  Sessional/Guest Lecturer  Tutor  Prefer not to say  *[Additional Text]*  Other (please describe) |
| **9.** | **Please indicate the *|q7_response|* degree(s)/course(s) /training you are involved in**  (*select all that apply)* |
|  | Bachelor  Certificate  Combined Masters/PhD  Diploma  Doctorate  Fellowship  Graduate Certificate  Graduate Diploma  Honours  Masters  Masters (qualifying)  Other (please describe)  Unsure  *[Additional Text]*  Other (please describe) |
| **10.** | **Please select the statement/s that apply to you Your selection will**  **help us understand your responses in the context of your role and knowledge of the**  ***|q7_response|* curriculum. You may select more than one option.**  *(select all that apply).* |
|  | I have high-level knowledge of the *|q7_response|* program curriculum  (e.g., program requirements/objectives, courses/training offered)  I have knowledge of the content covered within a particular  degree/course(s) in the *|q7_response|* program (e.g., course  requirements/objectives, units of study offered)  I have knowledge of subject-level content covered in particular unit(s) of  study for *|q7_response|* (e.g., lecture or tutorial content)  Unsure |
| **11.** | **Does your role involve changing or updating the curriculum offered in your**  **institution's *|q7_response|* program?**  (select all that apply)  (i.e., changes to the overall *|q7_response|* program offered within your institution, and/or the *|q7_response|* course/training curriculum, and/or *|q7_response|* units of study curriculum) |
|  | Yes, to the whole program  Yes, to a particular course/training program  Yes, to a specific unit of study  No  Unsure  *[Additional Text]*  If yes, please describe |
| **12.** | **In which state or territory is the *|q7_response|* program you are involved in offered?** *(you can select more than one)* |
|  | National (all)  ACT  NSW  NT  QLD  SA  TAS  WA  VIC  Unsure |
| **13.** | **You indicated that you are involved in *|q7_response|* training within the *|q9_response|* program(s). Approximately how many students are enrolled each year in the *|q7_response|* *|q9_response|* program(s)? Please answer to the best of your knowledge. If you are involved in or oversee more than one *|q7_response|***  **degree/course/training, please estimate the combined number of enrolled students across each of these courses. You may add further detail in the text box provided.** |
|  | 1-10  11-20  21-30  31-40  41-50  51-100  101-200  201-500  500+  Unsure  Prefer not to say  *[Additional Text]*  Please provide additional information as needed: |
| **14.** | **You indicated that you are involved in *|q7_response|* training within the *|q9_response|*program(s). Approximately how many teaching staff (sessional and ongoing) teach to this cohort of students per year?**  **If you are involved in or oversee more than one *|q7_response|* degree/course/training please estimate the combined number of teaching staff across each of these courses. You may add further detail in the text box provided.** |
|  | 1-5  6-10  11-20  21-30  31-40  41-50  50+  Unsure  Prefer not to say  *[Additional Text]*  Please provide additional information as needed: |
| **15.** | LANGUAGE KEY  Eating disorder content  Content that teaches information and builds  knowledge about eating disorders, disordered eating and/or body image concerns. **Eating disorder safe care**  Content that teaches information and knowledge about (1) Providing care for people experiencing eating disorders, disordered eating or body image concerns in a way which does not exacerbate these existing concerns; and/or (2) Providing routine healthcare in any setting in a way which does not contribute to eating disorder risk (e.g. by avoiding health care practices that overfocus on weight, contribute to body-based stigma or uphold unrealistic ideals about bodies, food and eating behaviour) and promotes protective factors (e.g. promoting weight-inclusive, body esteem building practices). |
|  | No answer to show |
| **16.** | **Please indicate how important you feel it is to teach students about eating disorders,**  **disordered eating, and/or body image concerns within the *|q7_response|* *|q9_response|* curriculum** |
|  | 5pt visual analogue scale  Low end label 1 = Not at all important  High end label 5 = Very important  *[Additional Text]*  Please describe your selection |
| **17.** | **Please indicate how important you feel it is to teach students about providing eating**  **disorder safe care (i.e., providing routine care that doesn’t contribute to weight stigma, disordered eating, or problematic weight control behaviours in any client/patient group) within the *|q7_response|* *|q9_response|* curriculum (e.g., how to apply weight neutral approaches to health, non-diet approaches, how to speak about bodies, food and eating that is safe, respectful and does not contribute to disordered eating or weight control behaviours in any client/patient group)** |
|  | 5pt visual analogue scale  Low end label 1 = Not at all important  High end label 5 = Very important  *[Additional Text]*  Please describe your selection |
| **18.** | **Does the *|q7_response|* *|q9_response|* curriculum currently provide opportunities for students to learn about eating disorders, disordered eating and/or body image? (e.g., core curriculum, unit(s) of study, placements, lecture content, tutorials, assignments, case studies)** |
|  | Yes  No  Unsure |
| **19.** | **Does the current *|q7_response|* *|q9_response|* curriculum cover specific topics/learning areas where students learn about providing eating disorder safe care (i.e., providing routine care that doesn't contribute to weight stigma, disordered eating, or problematic weight control behaviours)?**  **(e.g., within other topics, how to apply weight neutral approaches to health, nondiet**  **approaches, how to speak about bodies, food and eating that is safe, respectful and does not contribute to disordered eating or weight control behaviours)** |
|  | Yes  No  Unsure |
| **20.** | **Do you have knowledge of the specific topics that are covered in the *|q7_response|***  ***|q9_response|* curriculum regarding eating disorders, disordered eating and/or body image, or eating disorder safe care?** |
|  | Yes  No |
| **21.** | **Please list the unit(s) of study that offer learning opportunities in eating disorders,**  **disordered eating and/or body image within the *|q7_response|* *|q9_response|*** |
|  | Open Ended |
| **22.** | **From the list you created, please state the unit of study with the most eating disorder**  **content (only name one)** |
|  | Open Ended |
| **23.** | **Can you please nominate someone who may know this information?**  **Please move on to the next question if you are unsure or prefer not to say.** |
|  | Form field: Email |
| **24.** | **Please select which of the following aspects of care for eating disorders, disordered eating and body image are covered in the *|q7_response|* *|q9_response|* curriculum (select all that apply)** |
|  | Eating disorder safe care (students learn about providing routine care that mitigates eating disorder risk and doesn't contribute to weight stigma, disordered eating, or problematic weight control behaviours)  Prevention of eating disorders (students learn about modifiable risk factors, and/or protective factors)  Identification of eating disorders (students learn about eating disorder warning signs or symptoms, and/or how to engage with someone who may be experiencing an eating disorder)  Initial response to eating disorders (students learn how to undertake an initial assessment and preliminary diagnosis, and how to refer to the most appropriate treatment options)  Treatment of eating disorders (students learn about evidence-based treatment for eating disorders, roles within the multidisciplinary team and/or learn how to provide an evidence-based treatment)  Psychosocial and recovery support for eating disorders (students learn about services and programs which support the broader psychological and social needs, recovery, or improved quality of life of people experiencing an eating disorder, their families and supports)  Other (please describe)  Unsure  *[Additional Text]*  Other (please describe) |
| **25.** | **Eating disorder safe care : Please select which of the following learning areas are covered in the degree/course/training curriculum (select all that apply)**  **Students learn about...** |
|  | Providing routine care in a way that does not contribute to eating disorder risk or cause unintended harm for people with eating disorders  How weight bias can influence healthcare spaces and practices and the impacts of this for all people (e.g., preventing people from accessing or receiving appropriate care)  How diet culture can influence healthcare practices and the impacts of this for all people (e.g., the prescription of potentially harmful eating and body/weight control practices)  How comments about food, dieting, appearance, weight, and body size/shape can contribute to risk for developing or exacerbating an eating disorder, disordered eating, or body image concerns  Language and intersectional approaches to care that are respectful of the experience of food, bodies and eating across the spectrum of body size/shape, ability and features, gender, sexuality, culture, personal history, disability and neurotype  How to set up accessible care and care settings for people of all body shapes, sizes, and abilities  Working with people experiencing eating disorders in a way that is culturally safe and trauma-informed  The health, psychological and quality of life impacts of an eating disorder  Physical and psychiatric risk associated with disordered eating, disordered weight control behaviours, and eating disorders, and how to manage this within their scope of practice  Harm reduction approaches to working with eating disorders, disordered eating and disordered weight control behaviours  Understanding one’s of scope of practice and knowledge in eating disorders  Commitment to working up to the top of one’s scope of practice and knowledge in eating disorders  Recognising when and how to refer to another clinician/service is essential to safe and effective care  Other (please describe)  Unsure  *[Additional Text]*  Other (please describe) |
| **26.** | **Prevention: Please select which of the following learning areas are covered in**  **the degree/course/training curriculum (select all that apply)**  **Students learn about...** |
|  | Risk factors for developing an eating disorder  Social context and systemic factors that contribute to the prevalence of eating disorders  Factors that protect against developing an eating disorder (i.e., feminist analysis; power; social determinants of health)  Providing weight–inclusive health care (where weight change or weight control is not an intended outcome), also referred to as Non Diet Approach or Health at Every Size  Diet culture and its impact on health and wellbeing  Other (please describe)  Unsure  *[Additional Text]*  Other (please describe) |
| **27.** | **Identification: Please select which of the following learning areas are covered in the degree/course/training curriculum (select all that apply)**  **Students learn about...** |
|  | Understand common myths and misconceptions about disordered eating, eating disorders and body image that promote stigma and health care access inequality  How to support help seeking for an eating disorder  How to identify eating disorders (warning signs and indicators)  Common co-occurring conditions  Groups at high risk of developing an eating disorder  The impacts of weight bias on the identification and treatment of eating disorders  Their professional duty of care to know about and be able to respond to people experiencing eating disorders  How to engage with someone who may be experiencing an eating disorder  Other (please describe)  Unsure  *[Additional Text]*  Other (please describe) |
| **28.** | **Initial response: Please select which of the following learning areas are covered in the degree/course/training curriculum (select all that apply)**  **Students learn about...** |
|  | Knowledge about the impact of mental health and eating disorder stigma which may prevent people from accessing support  How to conduct an initial assessment and make a preliminary diagnosis  How to refer the person to the appropriate level of treatment and supports  Eating disorder prevalence  Other (please describe)  Unsure  *[Additional Text]*  Other (please describe) |
| **29.** | **Treatment: Please select which of the following learning areas are covered in**  **the degree/course/training curriculum (select all that apply)**  **Students learn about...** |
|  | Eating disorder multi-disciplinary care teams (e.g., what they are, who is included)  How to work with other professionals in caring for or treating someone with an eating disorder  Conducting eating disorder assessments  Diagnosing eating disorders (e.g., DSM-V or ICD-11 diagnostic criteria)  How eating disorder diagnoses can overlap and change over time  Biopsychosocial formulation  Treatment formulation and planning  Knowledge of the evidence-based treatments for eating disorders  Alternative and/or complementary treatments for eating disorders  Delivering an evidence-based brief intervention for eating disorders (i.e., CBT-Guided Self Help, Single Session Intervention, CBT-T)  Delivering an evidence-based longer term outpatient intervention for eating disorders (i.e., CBT-E, FBT, SSCM, evidence-informed dietetic care)  Sensory or occupation-based interventions for eating disorders  Medical management of eating disorders  Eating disorder care coordination  Setting and maintaining appropriate boundaries and non-negotiable aspects of treatment  Identifying and managing physical risk  Identifying and managing psychological risk  Harm reduction approaches to working with eating disorders, disordered eating and body image concerns  The relevance and personal meaning of eating disorder recovery  Other (please describe)  Unsure  *[Additional Text]*  Other (please describe) |
| **30.** | **Psychosocial and recovery support: Please select which of the following learning areas are covered in the degree/course/training curriculum (select all that apply)**  **Students learn about...** |
|  | How social determinants of health relate to and inform work with people experiencing eating disorders  Frameworks for understanding and enhancing psychosocial wellbeing for people experiencing eating disorders  Services and programs which support the broader psychological and social needs of people experiencing an eating disorder, their families and supports  Lived experience and peer support interventions  Family/carer and community support interventions  Other (please describe)  Unsure  *[Additional Text]*  Other (please describe) |
| **31.** | **Please state to what extent Eating Disorder Safe Care is relevant to students completing a degree/course/training in *|q7_response|* (e.g., how to provide routine care in a way that mitigates eating disorder risk and does not contribute to weight stigma, disordered eating and/or problematic weight control behaviours for all client/patient groups)** |
|  | *5 pt Visual Analogue Scale*  Low end label 1 = Not at all relevant  High end label 5 = Highly relevant  *[Additional Text]*  Please describe your selection |
| **32.** | **Please state to what extent prevention of eating disorders is relevant to students**  **completing a degree/course/training in *|q7_response|* (e.g., modifiable risk factors, and/or protective factors)** |
|  | *5 pt Visual Analogue Scale*  Low end label 1 = Not at all relevant  High end label 5 = Highly relevant  *[Additional Text]*  Please describe your selection |
| **33.** | **Please state to what extent Identification of eating disorders is relevant to students completing a degree/course/training in *|q7_response|* (e.g., eating disorder warning signs or symptoms, and/or how to engage with someone who may be experiencing an eating disorder)** |
|  | *5 pt Visual Analogue Scale*  Low end label 1 = Not at all relevant  High end label 5 = Highly relevant  *[Additional Text]*  Please describe your selection |
| **34.** | **Please state to what extent Initial response to eating disorders is relevant to students**  **completing a degree/course/training in *|q7_response|* (e.g., how to undertake initial assessments and preliminary diagnoses, and how to refer to the most appropriate treatment options)** |
|  | *5 pt Visual Analogue Scale*  Low end label 1 = Not at all relevant  High end label 5 = Highly relevant  *[Additional Text]*  Please describe your selection |
| **35.** | **Please state to what extent treatment of eating disorders is relevant to students completing a degree/course/training in *|q7_response|* (e.g., evidence-based treatment for eating disorders, roles within the multidisciplinary care teams)** |
|  | *5 pt Visual Analogue Scale*  Low end label 1 = Not at all relevant  High end label 5 = Highly relevant  *[Additional Text]*  Please describe your selection |
| **36.** | **Please state to what extent psychosocial and recovery support for eating disorders is**  **relevant to students completing a degree/course/training in *|q7_response|* (e.g., services and programs which support the broader psychological and social needs, recovery, or improved quality of life of people experiencing an eating disorder, their families and supports)** |
|  | *5 pt Visual Analogue Scale*  Low end label 1 = Not at all relevant  High end label 5 = Highly relevant  *[Additional Text]*  Please describe your selection |
| **37.** | **How is eating disorder content covered in the *|q7_response|* *|q9_response|* curriculum? (select all that apply)** |
|  | Embedded within core curriculum  As part of a larger module/topic (e.g., mental health, cardiovascular modules, child & adolescent health)  Dedicated lecture(s)  Dedicated tutorial(s)  Use of eating disorder case studies  Lived experience speakers  Written assignment(s)  Oral presentation(s)  Dedicated exam question(s)  Within placement/practicum placement or other integrated learning opportunities  Other (please specify)  Unsure  *[Additional Text]*  Other (please specify) |
| **38.** | **How much time is dedicated to teaching eating disorder content within the *|q7_response|* *|q9_response|* curriculum? Please answer this based on your knowledge of the curriculum (e.g., you only need to indicate how much time dedicated to eating disorders that you are aware of). If you teach across more than one course/program in *|q7_response|* please select other and advise approximately how much time is dedicated to teaching eating disorder content within each course/program Please use the approximate amount of time as**  **needed. Please do not include time spent in placement/clinical opportunities (this will be covered in a later question).** |
|  | <1 hour  1-2 hours  3-4 hours  5-10 hours  11-15 hours  >15 hours  Unsure  Other  I teach across multiple programs and this is a combined estimate (please provide information about the approximate hours per course below)  *[Additional Text]*  Other (please describe) |
| **39.** | **How many dedicated eating disorder placement/clinical opportunities exist in the *|q7_response|* *|q9_response|* curriculum? Please use the approximate number as needed. If you are involved in more than one course/program in *specialisation* please select other and advise approximately many dedicated eating disorder placement/clinical opportunities exist within each course/program** |
|  | Answer 1  1-2  3-4  5-10  11-15  >15  Unsure  *[Additional Text]*  Please specify whether you are responding from the program or course level |
| **40.** | **Can you nominate someone who knows this information?**  **Please move on to the next question if you are unsure or prefer not to say.** |
|  | Form field: Email |
| **41.** | **Where do you think eating disorder content could/should be taught within the**  ***|q7_response|* curriculum? (list all that apply) i.e., Could/should this be covered at**  **undergraduate level, masters or other level? Which subjects/topic areas do you perceive to be particularly relevant to your group? Could/should this be covered within the curriculum and/or through placement opportunities?** |
|  | Free text |
| **42.** | **Where do you think approaches to providing eating disorder safe care could/should be**  **taught within the *|q7_response|* curriculum? (list all that apply) (i.e., providing routine care that mitigates eating disorder risk and doesn't contribute to weight stigma, disordered eating, or problematic weight control behaviours) Could/should this be covered at undergraduate level, masters or other level? Which subjects/topic areas do you perceive to be particularly relevant to your group? Could/should this be covered within the curriculum and/or through placement opportunities?** |
|  | Free text |
| **43.** | **Do you, or anyone else in your program, have any plans to change course material or**  **placements in eating disorders over the next 12 months?**  **(Including any changes to program, course/training, unit of study curriculum, lecture/tutorial content).**  **Please select other if you have intentions to change but not in the next 12 months.** |
|  | Yes (please describe)  No  Unsure  Other (please describe)  *[Additional Text]*  Please describe |
| **44.** | **The final section will ask about what you think are the barriers and/or enablers to**  **embedding eating disorder content within the *|q7_response|* *|q9_response|* curriculum.** |
|  | Free text |
| **45.** | **Please indicate how difficult you feel it is to include eating disorder content within the**  ***|q7_response|* *|q9_response|* curriculum.** |
|  | *5 pt Visual Analogue Scale*  Low end label 1 = Very difficult  High end label 5 = Very easy  *[Additional Text]*  Please describe your selection |
| **46.** | **What do you believe to be the key barriers to including eating disorder content within the *|q7_response|* *|q9_response|* curriculum? (e.g., lack of resources, lack of eating disorder expertise, no interest)** |
|  | Free text |
| **47.** | **What factors (enablers) do you believe could make including eating disorder content within the *|q7_response|* *|q9_response|* curriculum easier or more likely ? (e.g., endorsement from peak professional bodies, clear guidelines, pre-prepared session plans, free online modules, access to lecturers with expertise, access to eating disorder placements, an eating disorders research program within the institution)** |
|  | Free text |
| **48.** | **Is there cross-faculty collaboration in eating disorder, disordered eating or body image**  **training in your institution? If so, which faculty do you collaborate with?** |
|  | Yes  No  Unsure  *[Additional Text]*  If yes, please describe |
| **49.** | **Are there any other comments about including eating disorders content within the**  ***|q7_response|* curriculum that you would like to add?** |
|  | Free text |
| **50.** | **KPMG and NEDC will be running focus groups and interviews to understand the challenges and/or opportunities to embedding eating disorder content within the tertiary curriculum.**  **Would you be happy for NEDC to contact you in the future about this?** |
|  | Yes  No |
| **51.** | **Would you be happy for NEDC to contact you regarding the following (please select all that apply)?** |
|  | Feedback on survey results and how your responses compare to others within your profession  NEDC Eating Disorder skill and professional development resources relevant to your program/students  Participation in the development of curriculum materials and programs to support student access to eating disorders content in the future  All of the above  None of the above |
| **52.** | **Please provide your name and email address.**  **This information will only be used to contact you as indicated in the previous questions, or to withdraw your responses if requested. We will store this information separately to your survey responses.** |
|  | Text: Name  Form: E-mail |
| **53.** | **As you have indicated that you do not consent to participate in this survey, it has now**  **ended. Please email info@nedc.com.au if you would like to speak with the project team. Thank you!** |
| **Outro** | Thank you so much for your time! Your response has been recorded. Please visit the NEDC website for more information and resources about eating disorders and the system of care. You can also join as a member here. If you would like to submit another response (e.g., because you work across more than one institution or program), please click 'Finish'. You will then be redirected to the start of the survey where you can submit another response. Please click 'Finish' and close your browser if this is your final response. If you have any questions, please email info@nedc.com.au |
